# Supplementary material for: Characterization of Porcine Ocular Surface Epithelial Microenvironment
Source: MDPI journal article supplement (doi:10.3390/ijms24087543), 2023-04-19
Supplement: s1 [file s1]

A

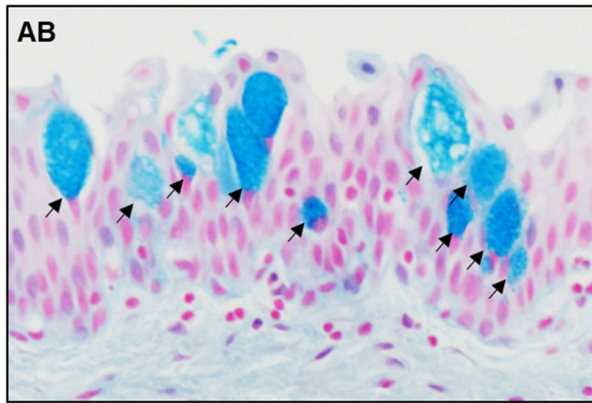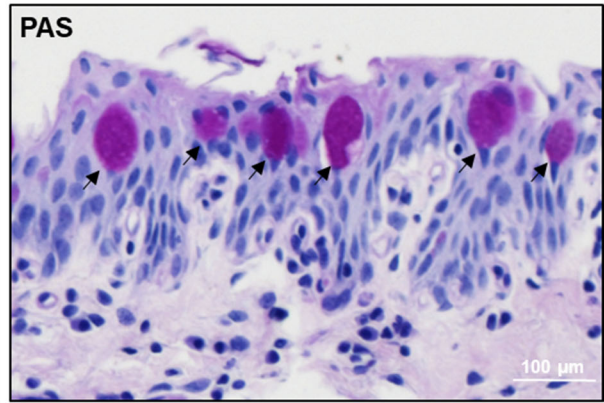

B

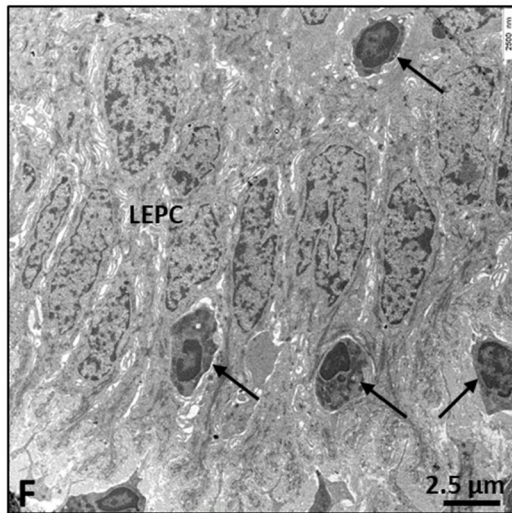

**Supplementary Figure S1:** (A) Alcian blue and periodic acid-Schiff (PAS) staining of inner eyelid showing the presence of goblet cells (arrows); (B) transmission electron micrograph limbal tissue showing the limbal epithelium intermingled with infiltrating immune cells (arrows).

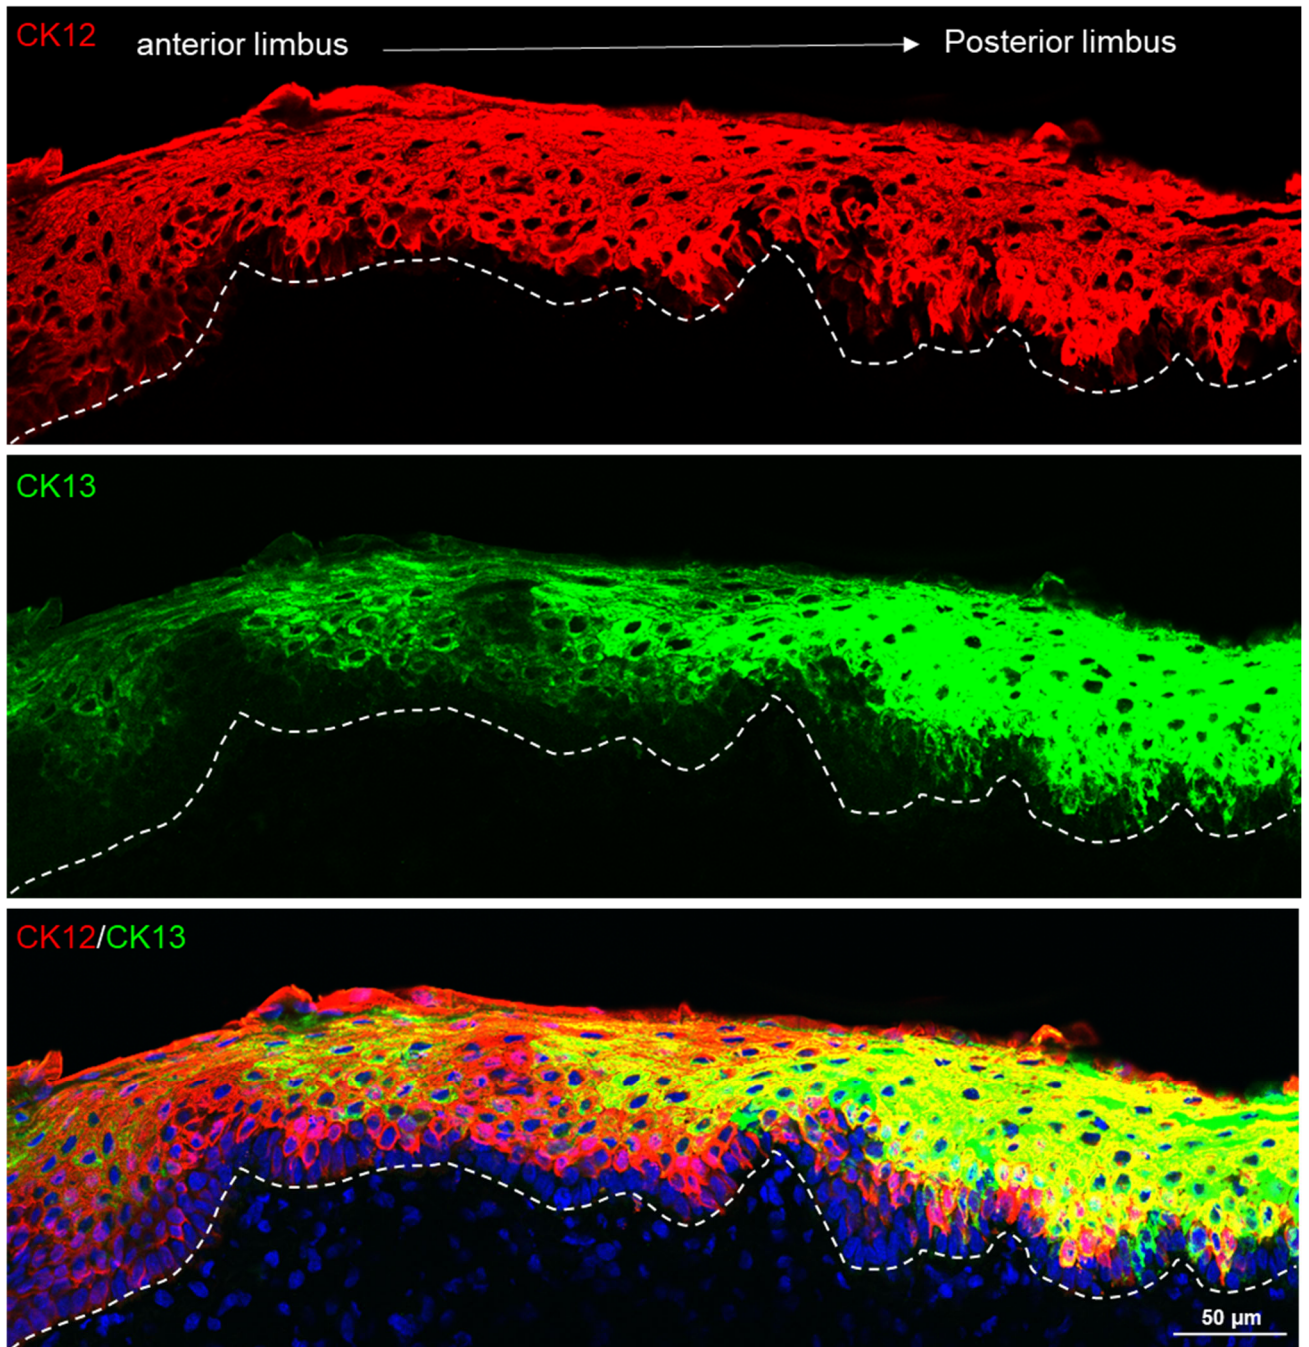

**Supplementary Figure S2:** Double immunostaining of corneoconjunctival frozen sections showing co-localization of CK12 (red) and CK13 (green) in the suprabasal layers of limbal epithelium, with the expression of CK13 increasing towards the conjunctiva. Nuclei are counterstained with 4',6-diamidino-2-phenylindole (blue); dashed line represents the BM.



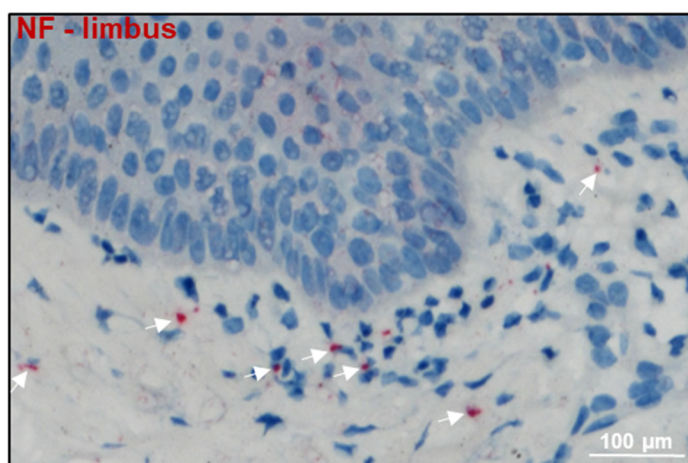

**Supplementary Figure S3:** Immunohistochemical staining of limbal section showing the neurofilament (NF) expression in the limbal stroma (arrows).

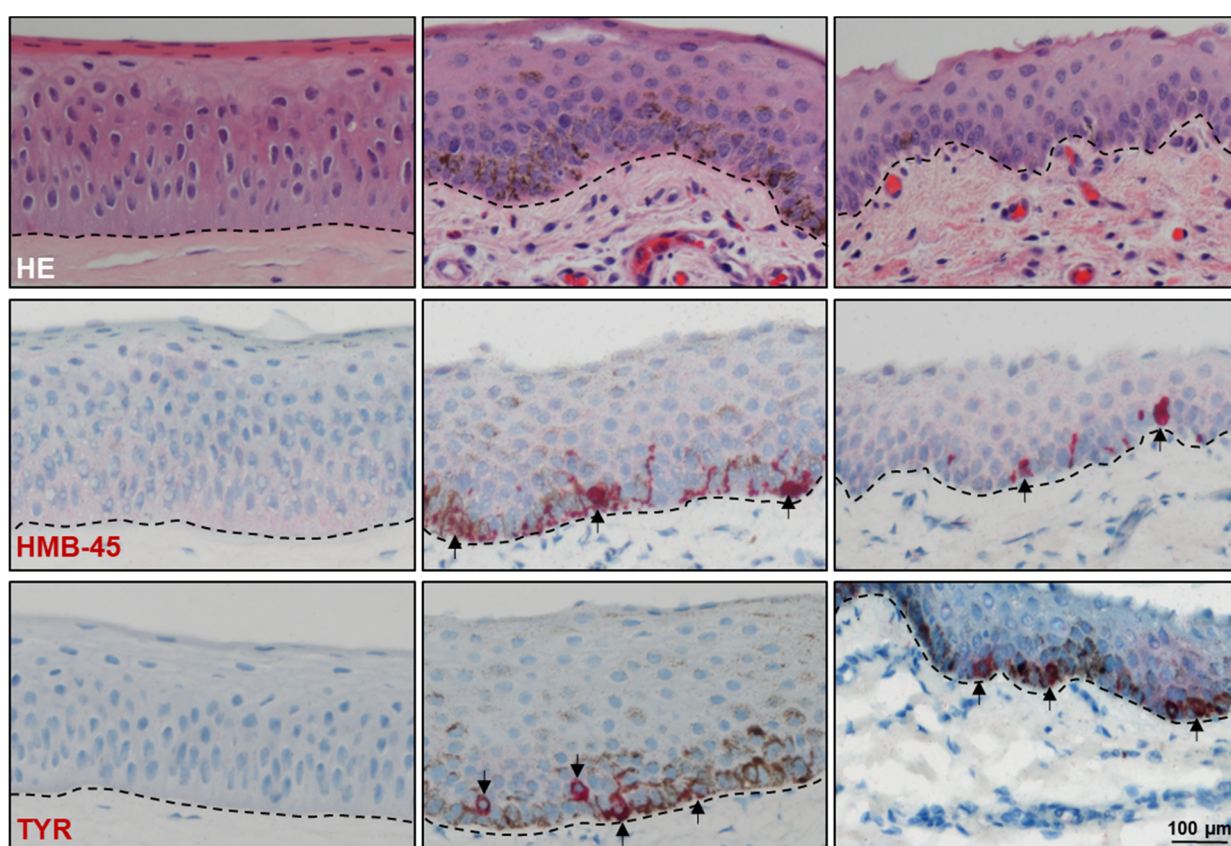

**Supplementary Figure S4:** Light micrographs of paraffin sections of corneoconjunctival tissue (wild pig) stained with hematoxylin and eosin (H&E); immunohistochemical staining showing the human melanoma black (HMB-45)<sup>+</sup> and tyrosinase (TYR)<sup>+</sup> cells in the basal layers of limbal and conjunctival epithelium; dashed line represents basement membrane.
