# Supplementary material for: Characterization of Porcine Ocular Surface Epithelial Microenvironment
Source: Int J Mol Sci. 2023 Apr 19;24(8):7543. doi: 10.3390/ijms24087543 (PMC10145510; doi:10.3390/ijms24087543)
Supplement: Supplementary file 1 [file ijms-24-07543-s001.zip › Supplementary Table S1_modified.xlsx]

## Sheet: Tabelle S1
	Supplier	Code	Clone	Host	Application	Target	Treatment	Dilution
ABCB5 (Sigma HPA026975) Rabbit	Sigma	HPA026975	polyclonal	Rabbit	IHC	human	Tris / EDTA	100
AGRN (SantaCruz sc-374117) Mouse	SantaCruz	sc-374117	D-2	Mouse	IHC	human	Tris / EDTA	100
CD1 (Southernbiotech 4500-01) Mouse	Southernbiotech	4500-01	76-7-4	Mouse	IF	human
CD4 (Abcam ab133616) Rabbit	Abcam	ab133616	EPR6855	Rabbit	IHC	human	Citrate	500
CD14 (Biolegend 301805) Mouse PE	Biolegend	301805	M5E2	Mouse	IF	human
CD45 (Abcam ab208022) Rabbit	Abcam	ab208022	EPR20033	Rabbit	IF	human
CD45 (Biolegend 304007) Mouse PE	Biolegend	304007	HI30	Mouse	IF	human
CD45 (Thermo MS-413-P0) Mouse	Thermo	MS-413-P0		Mouse	IF	human
CD68 (Abcam ab213363) Rabbit	Abcam	ab213363	EPR20545	Rabbit	IF	human
CD68 (Dako M0876) Mouse	Dako	M0876	PG-M1	Mouse	IF	human
CD163 (Dianova DLN-006367) Mouse	Dianova	DLN-006367	10D6, 163C01	Mouse	IF	human
CD206 (Novus NBP2-52927) Mouse	Novus	NBP2-52927	CL0387	Mouse	IF	human
CDH2 (CST 13116S) Rabbit	CST	13116S	D4R1H	Rabbit	IF	human
CDH3 (Abcam ab19350) Mouse	Abcam	ab19350	6A9	Mouse	IF	human
COL4 (Abcam ab19808) Rabbit	Abcam	ab19808	polyclonal	Rabbit	IF	human
COL4 (SouthernBiotech 1460-02) Mouse	SouthernBiotech	1460-02	2F11	Mouse	IF	human
DAG1 (Novus NBP3-13643) Mouse	Novus	NBP3-13643	GT835	Mouse	IHC	human	Tris / EDTA	500
DSG1 (Thermo 32-6000) Mouse	Thermo	32-6000	27B2	Mouse	IF	human
FN1 (Sigma F0916) Mouse	Sigma	F0916	IST-4	Mouse	IF	human
HLA-DRA (Abcam ab92511) Rabbit	Abcam	ab92511	EPR3692	Rabbit	IHC	human	Citrate	1000
ICAM1 (Sigma CP53) Mouse	Sigma	CP53	W-CAM-1	Mouse	IF	human
ITGA3 (Sigma MAB1952Z) Mouse	Sigma	MAB1952Z	P1B5	Mouse	IHC	human	Tris / EDTA	300
ITGA3/ITGB1 (Thermo BS-1057R) Rabbit	Thermo	BS-1057R	polyclonal	Rabbit	IHC	human	Tris / EDTA	500
Ki-67 (Abcam ab92742) Rabbit	Abcam	ab92742	EPR3610	Rabbit	IHC	human	Tris / EDTA	2000
Ki-67 (DAKO M7240) Mouse	DAKO	M7240	MIB-1	Mouse	IHC	human	Tris / EDTA	100
KRT10 (Novus NBP2-47650) Mouse	Novus	NBP2-47650	DE-K10	Mouse	IHC	human	Citrate or Tris / EDTA	200
KRT12 (Abcam ab185627) Rabbit	Abcam	ab185627	EPR17882	Rabbit	IHC	human	Tris / EDTA	500
KRT13 (Thermo MA1-35542) Mouse	Thermo	MA1-35542	2D7	Mouse	IHC	human	Tris / EDTA	100
KRT14 (Abcam ab7800) Mouse	Abcam	ab7800	LL002	Mouse	IHC	human	Citrate or Tris / EDTA	200
KRT15 (Invitrogen MA5-11344) Mouse	Invitrogen	MA5-11344	LHK15	Mouse	IHC	human	Tris / EDTA	500
KRT17 / KRT19 (CST 12434S) Rabbit	CST	12434S	D4G2	Rabbit	IHC	human	Citrate or Tris / EDTA	200
LAMA5 (Millipore MAB1924) Mouse	Millipore	MAB1924	4C7	Mouse	IHC	human	Tris / EDTA	2000
MLANA (Abcam ab210546) Rabbit	Abcam	ab210546	EPR20380	Rabbit	IF	human
MLANA (DAKO M7196) Mouse	DAKO	M7196	A103	Mouse	IF	human
MLANA (ENZO ENZ-ABS314) Mouse	ENZO	ENZ-ABS314	rMLANA/788	Mouse	IF	human
MLANA (Origene CF506018) Mouse	Origene	CF506018	OTI3E2	Mouse	IF	human
NES (Origene AM05803PU-M) Mouse	Origene	AM05803PU-M	10C2	Mouse	IF	human
Neurofilament (Agilent M076229-2) Mouse	Agilent	M076229-2	2F11	Mouse	IHC	human	Tris / EDTA	100
pan-KRT (Abcam ab6401) Mouse	Abcam	ab6401	PCK-26	Mouse	IHC	human	Citrate	1000
PAX6 (Biolegend 901301) Rabbit	Biolegend	901301	polyclonal	Rabbit	IHC	human	Tris / EDTA	500
PAX6 (CST 60433S) Rabbit	CST	60433S	D3A9V	Rabbit	IHC	human	Tris / EDTA	500
PMEL (Abcam ab787) Mouse	Abcam	ab787	HMB45	Mouse	IHC	human	Citrate or Tris / EDTA	100
PTPRC (Biorad MCA461GA) Mouse	Biorad	MCA461GA	UCHL1	Mouse	IF	human
S100B (Agilent GA50461-2) Rabbit	Agilent	GA50461-2	polyclonal	Rabbit	IHC	human	Citrate or Tris / EDTA	20
SOX10 (Abcam ab155279) Rabbit	Abcam	ab155279	EPR4007	Rabbit	IHC	human	Tris / EDTA	500
TNC (Abcam ab108930) Rabbit	Abcam	ab108930	EPR4219	Rabbit	IHC	human	Citrate or Tris / EDTA	500
TP63 (CST 67825) Rabbit	CST	67825	E6Q3O	Rabbit	IHC	human	Tris / EDTA	100
TYR (Thermo MA5-14177) Mouse	Thermo	MA5-14177	T311	Mouse	IHC	human	Tris / EDTA	500
TYRP1 (Abcam ab235447) Rabbit	Abcam	ab235447	EPR21960	Rabbit	IHC	human	Citrate or Tris / EDTA	100
VIM (CST 5741S) Rabbit	CST	5741S	D21H3	Rabbit	IHC	human	Citrate or Tris / EDTA	500
VWF (Sigma F3520) Rabbit	Sigma	F3520	polyclonal	Rabbit	IHC	human	Tris / EDTA	1000

## Sheet: Tabelle S2
	Antigens	Supplier	Code	Clone	Host	Application	Target	Treatment	Dilution	Reactivity
1	Agrin	SantaCruz	sc-374117	D-2	Mouse	IHC-P	human	Tris / EDTA	100	No
2	CD1a	Biolegend	300103	HI149	Mouse	IHC-F	Human	−		No
	CD1	Southernbiotech	4500-01	76-7-4	Mouse	IHC-F	Porcine	−	200	Yes
3	CD4	Abcam	ab133616	EPR6855	Rabbit	IHC-P	human	Citrate	500	Yes
4	CD14	Biolegend	301805	M5E2	Mouse	IHC-F	human	−		No
	CD14	Bio-Rad	MCA1218GA	MIL2	Mouse	IHC-F	Porcine	−	200	Yes
5	CD44	Biolegend	103023	IM7	Rat	IHC-F	human	−	200	Yes
6	CD90	BD Pharmingen	559869	5E10	Mouse	IHC-F	human	−	200	Yes
7	Cadherin, neural(N)	CST	13116S	D4R1H	Rabbit	IHC-F	human	−		No
8	Cadherin, placental (P)	R&D sytems	FAB861G	104805	Mouse	IHC-F	human	−	25	Yes
9	Collagen type IV	SouthernBiotech	1460-02	2F11	Mouse	IHC-F	human	−	600	Yes
10	β-dytroglycan	Novus	NBP3-13643	GT835	Mouse	IHC-P/IF	human	Tris / EDTA	500	Yes
11	Desmogelin (DSG)-1	Thermo	32-6000	27B2	Mouse	IHC-F	human	−		No
12	E-cadherin	Cell Signaling	3195	24E10	Mouse	IHC-F	human	−	600	Yes
13	Fibronectin	Sigma	F0916	IST-4	Mouse	IHC-F	human	−		No
14	HLA-ABC	Novus	NBP2-89119	11C3	Mouse	IHC-F	human	−	100	Yes
15	HLA-DRA	Abcam	ab92511	EPR3692	Rabbit	IHC-P	human	Citrate	1000	Yes
16	Intercellular adhesion molecule (ICAM)-1	Sigma	CP53	W-CAM-1	Mouse	IHC-F	human	−		No
17	Integrin alpha 3	Sigma	MAB1952Z	P1B5	Mouse	IHC-F	human	−	300	Yes
	Integrin alpha 3/beta 1	Thermo	BS-1057R	polyclonal	Rabbit	IHC-P	human	Tris / EDTA	500	Yes
18	Integrin alpha 6	Merck	MAB1378	NKI-GoH3	Rat	IHC-F	human	−	200	Yes
19	Ki-67	DAKO	M7240	MIB-1	Mouse	IHC-P	human	Tris / EDTA	100	Yes
20	Cytokeratin 3	Merck	CBL218	AE5	Mouse	IHC-F	human	−	200	yes
21	Cytokeratin 12	Abcam	ab185627	EPR17882	Rabbit	IHC-P/IF	human	Tris / EDTA	500	Yes
22	Cytokertin 13	Thermo	MA1-35542	2D7	Mouse	IHC-P/IF	human	Tris / EDTA	100	Yes
23	Cytokeratin 14	Abcam	ab7800	LL002	Mouse	IHC-P/IF	human	Citrate or Tris / EDTA	200	Yes
24	Cytokeratin 15	Invitrogen	MA5-11344	LHK15	Mouse	IHC-F	human		500	Yes
25	Cytokeratin 17/19	CST	12434S	D4G2	Rabbit	IHC-P	human	Citrate or Tris / EDTA	200	Yes
26	Laminin α3	R&D sytems	MAB21441	546215	Mouse	IHC-F	human	−		No
27	Laminin α5	Millipore	MAB1924	4C7	Mouse	IHC-F	human	−		No
28	Melan-A	Abcam	ab210546	EPR20380	Rabbit	IHC-P/F	human	Citrate or Tris / EDTA		No
	Melan-A	DAKO	M7196	A103	Mouse	IHC-P/F	human	Citrate or Tris / EDTA
	Melan-A	ENZO	ENZ-ABS314	rMLANA/788	Mouse	IHC-P/F	human	Citrate or Tris / EDTA
	Melan-A	Origene	CF506018	OTI3E2	Mouse	IHC-P/F	human	Citrate or Tris / EDTA
29	Nestin	Origene	AM05803PU-M	10C2	Mouse	IHC-F	human	Citrate or Tris / EDTA		No
30	Neurofilament	Agilent	M076229-2	2F11	Mouse	IHC-P/IF	human	Tris / EDTA	100	Yes
31	Cytokeratin, pan	Abcam	ab6401	PCK-26	Mouse	IHC-P/IF	human	Citrate	1000/250	Yes
32	PAX-6	Biolegend	901301	polyclonal	Rabbit	IHC-P/IF	human	Tris / EDTA	500	Yes
	PAX-6	CST	60433S	D3A9V	Rabbit	IHC-P/IF	human	Tris / EDTA	500	Yes
33	Human melanoma black (HMB)-45	Abcam	ab787	HMB45	Mouse	IHC-P	human	Citrate or Tris / EDTA	100	Yes
34	S100B	Agilent	GA50461-2	polyclonal	Rabbit	IHC-P	human	Citrate or Tris / EDTA	20	Yes
35	SOX-10	Abcam	ab155279	EPR4007	Rabbit	IHC-P	human	Tris / EDTA	500	Yes
36	Tenascin -C	Abcam	ab108930	EPR4219	Rabbit	IHC-P/IF	human	Citrate or Tris / EDTA	500	Yes
37	TP63	CST	67825	E6Q3O	Rabbit	IHC-P	human	Tris / EDTA	100	Yes
38	Tyrosinase	Thermo	MA5-14177	T311	Mouse	IHC-P	human	Tris / EDTA	500	No
39	Tyrosinase related protein (TRP)1	Abcam	ab235447	EPR21960	Rabbit	IHC-P	human	Citrate or Tris / EDTA	100	Yes
40	Vimentin	CST	5741S	D21H3	Rabbit	IHC-P/IF	human	Citrate or Tris / EDTA	500	Yes
41	von Willebrand factor	Sigma	F3520	polyclonal	Rabbit	IHC-P	human	Tris / EDTA	1000	Yes
